# Supplementary material for: Unconventional capacity increase kinetics of a chemically engineered SnO2 aerogel anode for long-term stable lithium-ion batteries
Source: Royal Society of Chemistry journal article supplement (doi:10.1039/d0ta02188a), 2020-01-01
Supplement: d0ta02188a1.pdf [file d0ta02188a1.pdf]

## Supplementary Information

### Unconventional Capacity Increase Kinetics of Chemically Engineered SnO<sub>2</sub>

#### Aerogel Anode toward Long-Term Stable Lithium-Ion Batteries

Sung Mi Jung,<sup>‡a</sup> Dong Won Kim<sup>‡b</sup> and Hyun Young Jung<sup>\*b</sup>

<sup>a</sup>Environmental Fate & Exposure Research Group, Korea Institute of Toxicology, Jinju-si, Gyeongnam 52834, South Korea. <sup>b</sup>Department of Energy Engineering, Gyeongnam National University of Science and Technology, Jinju-si, Gyeongnam 52725, South Korea.

\* To whom correspondence should be addressed. E-mail: [hyjung@gntech.ac.kr](mailto:hyjung@gntech.ac.kr)

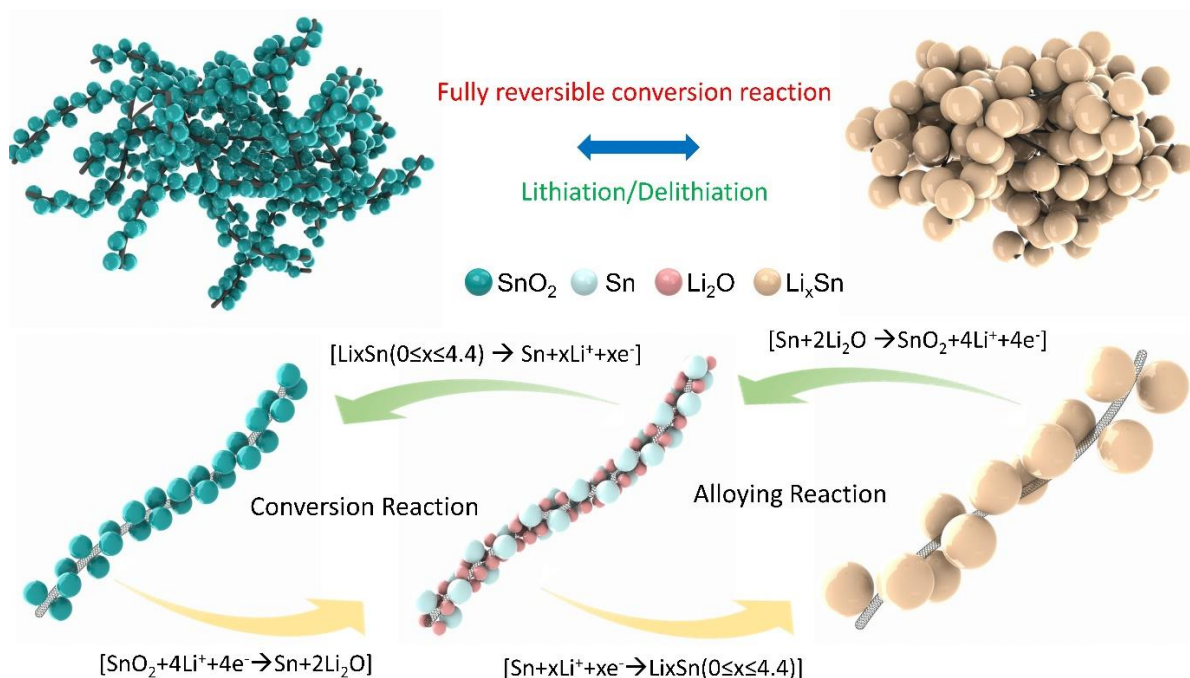

**Figure S1.** Overall electrochemical reactions between Li-ions and SnO<sub>2</sub> nanoparticles occurring during the lithiation/delithiation processes.

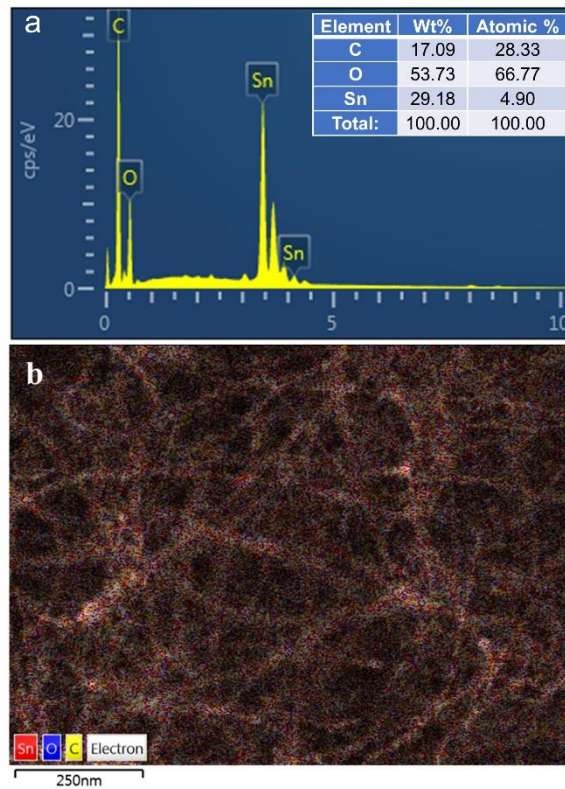

**Figure S2.** (a) EDS spectrum and (b) element mapping image of the SnO<sub>2</sub> aerogel active material.

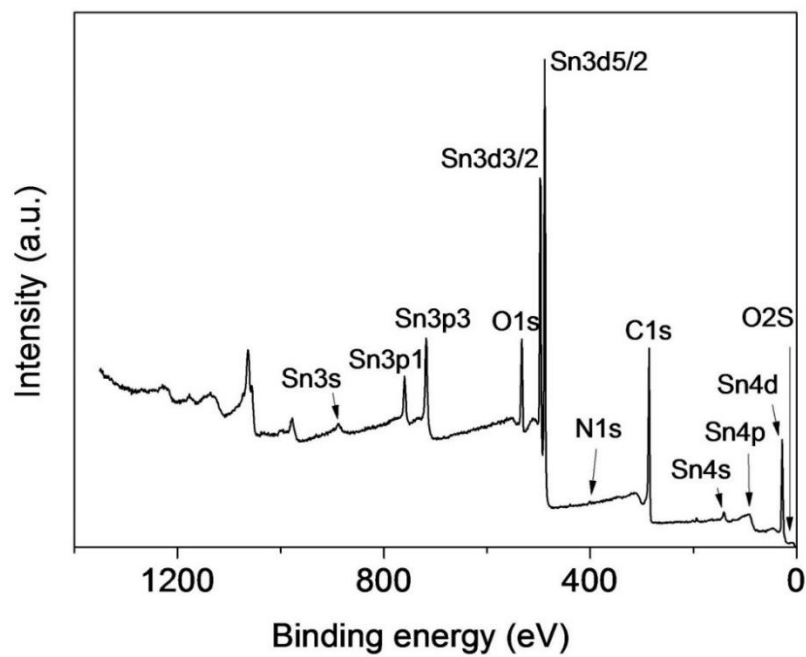

**Figure S3.** The full XPS spectrum of the SnO<sub>2</sub> aerogel active material.

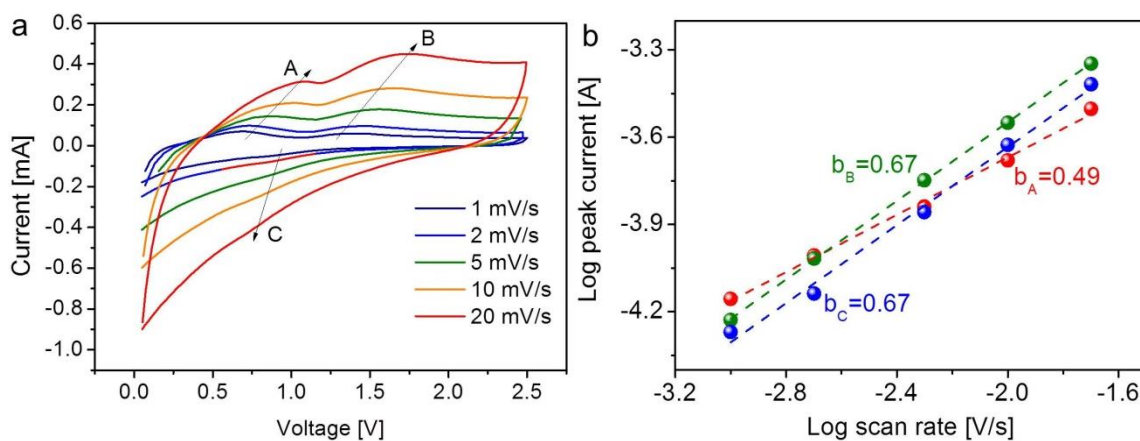

**Figure S4.** (a) Sequential CV curves with various scan rates of 1, 2, 5, 10, and 10 mV/s. (b)  $b$ -value at the anodic (A, B) and cathodic (C) peaks in the CV curves.

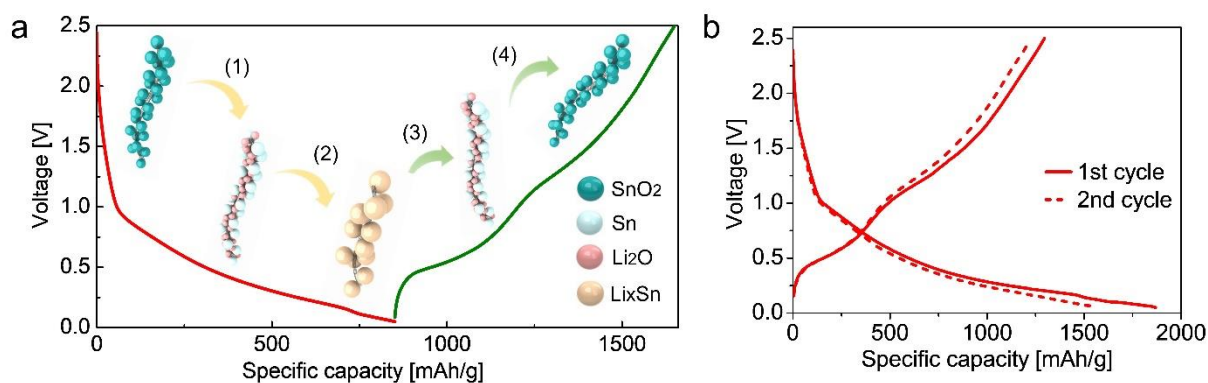

**Figure S5.** (a) Reaction mechanism according to the lithiation/delithiation cycle, which was representatively measured at a current density of  $395 \text{ mA g}^{-1}$ . (b) Curves of first and second lithiation/delithiation processes at a current density of  $79 \text{ mA g}^{-1}$ .

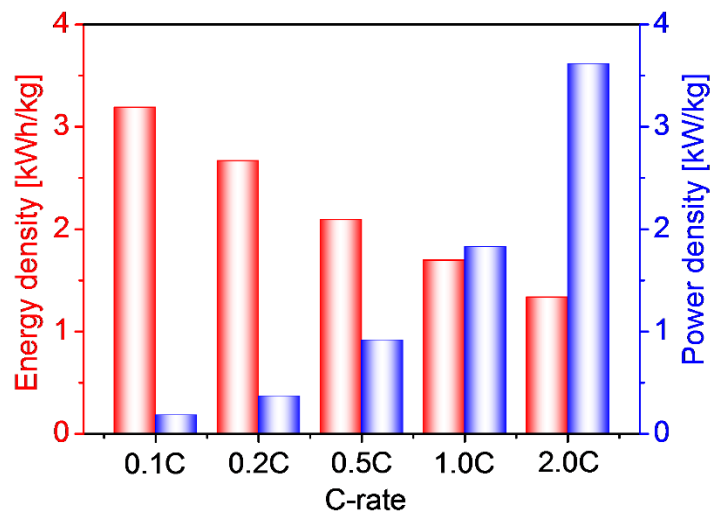

**Figure S6.** Energy and power densities of the SnO<sub>2</sub> aerogel device extracted from low C-rates (0.1 C to 2 C) of Figures 4a and 4b.

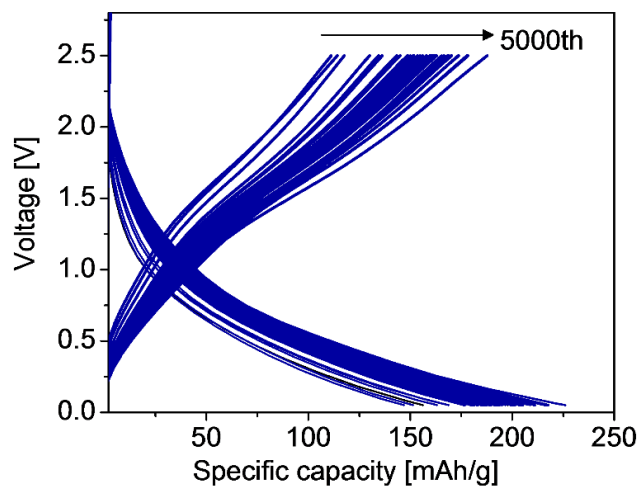

**Figure S7.** Real time-charge/discharge curves of the SnO<sub>2</sub> aerogel device at 10 C (7900 mA g<sup>-1</sup>).

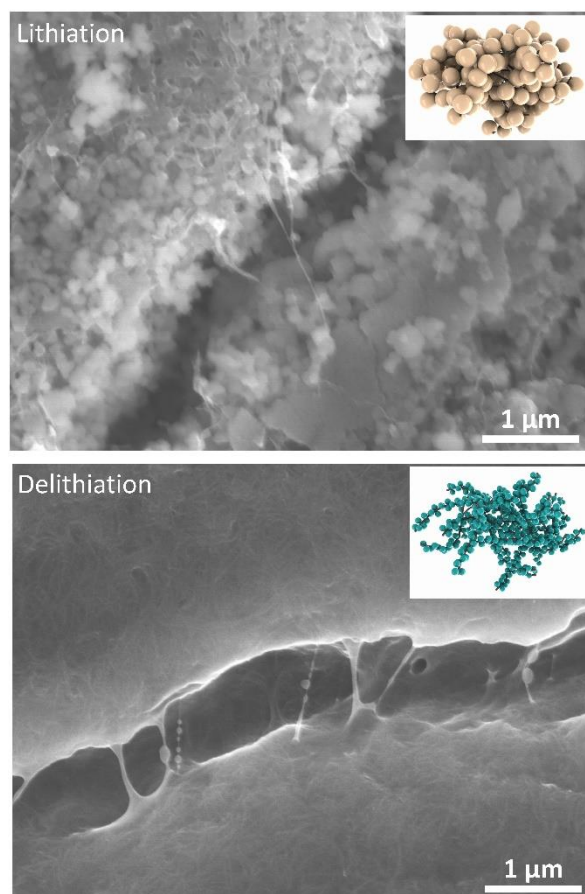

**Figure S8.** FE-SEM images of the SnO<sub>2</sub> aerogel electrode after 10 cycles at 10 C during lithiation and delithiation processes.

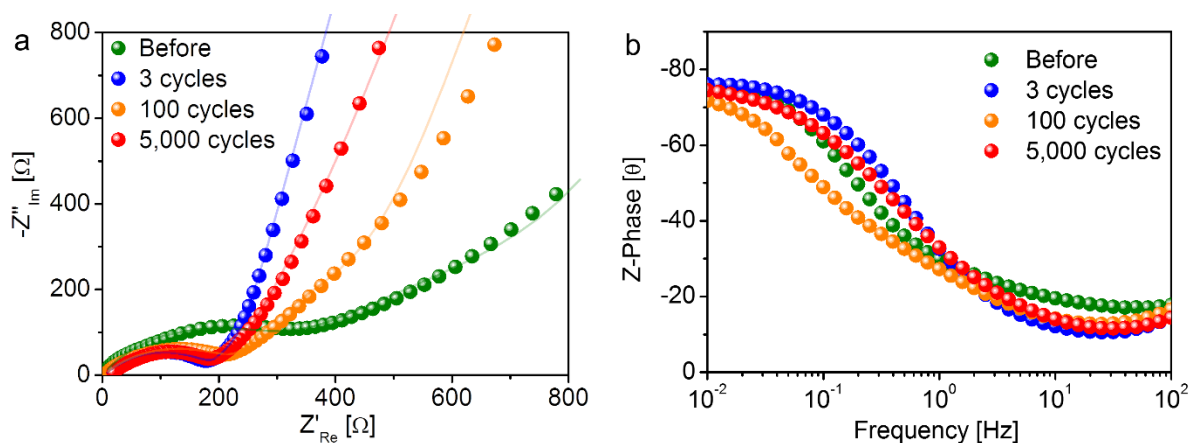

**Figure S9.** (a) Nyquist plots at the high- and middle frequency region. (b) Z-phase vs. Frequency as a function of cycles.

**Table S1.** Comparison of discharge capacity and energy density using SnO<sub>2</sub>/carbon compound electrodes.

| Anode (SnO <sub>2</sub> contents)                    | OPW[V]    | Discharge capacity [mAh/g]   | Es[Wh/kg] | Ref.      |
|------------------------------------------------------|-----------|------------------------------|-----------|-----------|
| 3D porous SnO <sub>2</sub> aerogel (37wt%)           | 0.05~2.5  | 1361, 0.079A/g (5th cycles)  | 3188      | this work |
|                                                      |           | 1919, 0.79A/g (Recovery)     | 4528      |           |
| CNT/Perforated SnO <sub>2</sub> (~83.1wt%)           | 0.001~3.0 | 1108, 1.5A/g                 | 3323      | S1        |
| CNT/c-SnO <sub>2</sub> (~72 wt%)                     | 0.01~3.0  | 1140, 0.05A/g                | 3409      | S2        |
| CNTH/SnO <sub>2</sub> (~57.6wt%)                     | 0.01~3.0  | 1109.5, 0.1A/g               | 3317      | S3        |
| MWCNT/SnO <sub>2</sub> (~75wt%)                      | 0.001~2.5 | ~682, 0.05A/g                | 1704      | S4        |
| MWCNT/SnO <sub>2</sub> (~75.5wt%)                    | 0.005~2.5 | 963, 0.0782A/g               | 2403      | S5        |
| SWNT Paper/SnO <sub>2</sub> (~34wt%)                 | 0.01~2.0  | ~669.52, 0.025A/g            | 1332      | S6        |
| porous-CNT/SnO <sub>2</sub> (~64.7wt%)               | 0.01~3.0  | 968,0.1A/g                   | 2894      | S7        |
| Activated CNT/SnO <sub>2</sub> (~65wt%)              | 0.01~2.5  | 829.5, 0.2mA/cm <sup>2</sup> | 2037      | S8        |
| Gr/CNT/SnO <sub>2</sub> (~49.5wt%)                   | 0.01~3.0  | 947, 0.1A/g                  | 2832      | S9        |
| Gr/CNT/SnO <sub>2</sub> (~55.3wt%)                   | 0.001~3.0 | 864, 0.05A/g                 | 2273      | S10       |
| Carbon/CNT/SnO <sub>2</sub> (~62.39wt%)              | 0.01~2.5  | 1572, 0.2A/g                 | 3914      | S11       |
| Carbon coated-CNT Sponge/SnO <sub>2</sub> (~22.9wt%) | 0.01~3.0  | ~943, 0.1A/g                 | 2820      | S12       |
| GF/ SnO <sub>2</sub> nanorod array/ PANI (~77wt%)    | 0.05~3.0  | 740, 0.1A/g                  | 2183      | S13       |
| SGF(Gr Foam)/SnO <sub>2</sub> (~45.56wt%)            | 0.01~3.0  | 918.1, 0.2A/g                | 2745      | S14       |
| C@SnO <sub>2</sub> @C HNSs (~54wt%)                  | 0.005~3.0 | 1123, 0.1A/g                 | 3363      | S15       |
| Gr/SnO <sub>2</sub> (~67wt%)                         | 0.01~3.0  | 1025, 0.1A/g                 | 3065      | S16       |

**Table S2.** Comparison of cycle stability using SnO<sub>2</sub>/carbon compound electrodes.

| Anode (SnO <sub>2</sub> contents)                                    | OPW[V]    | Discharge capacity [mAh/g]   | Cyclability [%] and conditions |                     | Ref.      |
|----------------------------------------------------------------------|-----------|------------------------------|--------------------------------|---------------------|-----------|
| 3D porous SnO <sub>2</sub> aerogel (37wt%)                           | 0.05~2.5  | 1919, 0.79A/g                | 600                            | 0.79A/g             | this work |
|                                                                      |           | 224, 7.9A/g                  | 10,000                         | 5.5A/g              |           |
| CNT/Perforated SnO <sub>2</sub> (~83.1wt%)                           | 0.001~3.0 | 1108, 1.5A/g                 | 1000 (>74.5%)                  | 4.0A/g              | S1        |
| CNT/c-SnO <sub>2</sub> (~72 wt%)                                     | 0.01~3.0  | 1140, 0.05A/g                | 500 (>72.0%)                   | 1.0A/g              | S2        |
| CNTH/SnO <sub>2</sub> (~57.6wt%)                                     | 0.01~3.0  | 1109.5, 0.1A/g               | 100 (>74.2%)                   | 0.2A/g              | S3        |
| MWCNT/SnO <sub>2</sub> (~75wt%)                                      | 0.001~2.5 | ~682, 0.05A/g                | 100 (>10.1%)                   | 0.05A/g             | S4        |
| MWCNT/SnO <sub>2</sub> (~75.5wt%)                                    | 0.005~2.5 | 963, 0.0782A/g               | 100 (>90%)                     | 3.91A/g             | S5        |
| SWNT Paper/SnO <sub>2</sub> (~34wt%)                                 | 0.01~2.0  | ~669.52, 0.025A/g            | 100 (>67.8%)                   | 0.025A/g            | S6        |
| porous-CNT/SnO <sub>2</sub> (~64.7wt%)                               | 0.01~3.0  | 968,0.1A/g                   | 500 (>114.1%)                  | 1.0A/g              | S7        |
| Activated CNT/SnO <sub>2</sub> (~65wt%)                              | 0.01~2.5  | 829.5, 0.2mA/cm <sup>2</sup> | 50 (>89.7%)                    | 1mA/cm <sup>2</sup> | S8        |
| Gr/CNT/SnO <sub>2</sub> (~49.5wt%)                                   | 0.01~3.0  | 947, 0.1A/g                  | 300(>78.0%)                    | 0.6A/g              | S9        |
| Gr/CNT/SnO <sub>2</sub> (~55.3wt%)                                   | 0.001~3.0 | 864, 0.05A/g                 | 300(>55.9%)                    | 1.0A/g              | S10       |
| Carbon/CNT/SnO <sub>2</sub> (~62.39wt%)                              | 0.01~2.5  | 1572, 0.2A/g                 | 150(>60.7%)                    | 1.0A/g              | S11       |
| Carbon coated-CNT Sponge/SnO <sub>2</sub> (~22.9wt%)                 | 0.01~3.0  | ~943, 0.1A/g                 | 100(>90.56%)                   | 0.1A/g              | S12       |
| GF/ SnO <sub>2</sub> nanorod array/ PANI (~77wt%)                    | 0.05~3.0  | 740, 0.1A/g                  | 50(>76.8%)                     | 0.5A/g              | S13       |
| SGF(Gr Foam)/SnO <sub>2</sub> (~45.56wt%)                            | 0.01~3.0  | 918.1, 0.2A/g                | 50(>73.9%)                     | 0.2A/g              | S14       |
| C@SnO <sub>2</sub> @C HNSs (~54wt%)                                  | 0.005~3.0 | 1123, 0.1A/g                 | 1000(>92%)                     | 10.0A/g             | S15       |
| Gr/SnO <sub>2</sub> (~67wt%)                                         | 0.01~3.0  | 1025, 0.1A/g                 | 300(>84%)                      | 0.1A/g              | S16       |
| dual carbon shells coated SnO <sub>2</sub> hollow nanospheres(41.7%) | 0.01~3.0  | 694, 0.2A/g                  | 300(78.7%)                     | 0.2A/g              | S17       |
| dual carbon shells coated SnO <sub>2</sub> hollow nanospheres(41.7%) | 0.01~3.0  | 400, 5A/g                    | 10000                          | 5A/g                | S17       |
| Sn-SnO <sub>2</sub> @CNT composite                                   | 0.01~3.0  | 744, 0.5A/g                  | 1000(86%)                      | 0.5A/g              | S18       |

**Table S3.** EIS fitted parameters of the SnO<sub>2</sub> aerogel cells before cycling and after 3, 100, and 5000 cycles. The fitted typical equivalent circuit model was conducted using ZsimpWin.

| Samples      | R <sub>s</sub> (Ω) | CPE <sub>SEI</sub> [Y <sub>0</sub> , (Ss <sup>n1</sup> cm <sup>-2</sup> )] | n <sub>1</sub> | R <sub>SEI</sub> (Ω) | CPE <sub>CT</sub> [Y <sub>0</sub> , (Ss <sup>n2</sup> cm <sup>-2</sup> )] | R <sub>CT</sub> (Ω) | n <sub>2</sub> | W (Y <sub>0</sub> , Ss <sup>0.5</sup> cm <sup>-2</sup> ) | D <sub>Li<sup>+</sup></sub> [cm <sup>2</sup> s <sup>-1</sup> ] |
|--------------|--------------------|----------------------------------------------------------------------------|----------------|----------------------|---------------------------------------------------------------------------|---------------------|----------------|----------------------------------------------------------|----------------------------------------------------------------|
| Fresh        | 3.3                | 8.72 × 10 <sup>-5</sup>                                                    | 0.68           | 304.7                | 3.24 × 10 <sup>-3</sup>                                                   | 706.4               | 0.57           | 0.562 × 10 <sup>-2</sup>                                 | 2.38 × 10 <sup>-12</sup>                                       |
| 3 Cycles     | 3.7                | 3.63 × 10 <sup>-4</sup>                                                    | 0.71           | 28.5                 | 1.43 × 10 <sup>-2</sup>                                                   | 195.2               | 0.86           | 1.66 × 10 <sup>-2</sup>                                  | 10.22 × 10 <sup>-12</sup>                                      |
| 100 Cycles   | 3.9                | 4.24 × 10 <sup>-4</sup>                                                    | 0.67           | 34.2                 | 3.22 × 10 <sup>-2</sup>                                                   | 208.7               | 0.81           | 2.32 × 10 <sup>-2</sup>                                  | 17.22 × 10 <sup>-12</sup>                                      |
| 5,000 Cycles | 3.8                | 4.03 × 10 <sup>-4</sup>                                                    | 0.62           | 33.5                 | 2.93 × 10 <sup>-2</sup>                                                   | 190.2               | 0.81           | 2.03 × 10 <sup>-2</sup>                                  | 11.94 × 10 <sup>-12</sup>                                      |

## References

- [S1] S.H. Choi, J.-H. Lee, Y.C. Kang, *ACS Nano* 2015, **9**, 10173-10185.
- [S2] P. Bhattacharya, J.H. Lee, K.K. Kar, H.S. Park, *Chem. Eng. J.* 2019, **369**, 422-431.
- [S3] M. Liu, S. Zhang, H. Dong, X. Chen, S. Gao, Y. Sun, W. Li, J. Xu, L. Chen, A. Yuan, W. Li, *ACS Sustainable Chem. Eng.* 2019, **7**, 4195-4203.
- [S4] Y. Cheng, J. Huang, H. Qi, L. Cao, J. Yang, Q. Xi, X. Luo, K. Yanagisawa, J. Li, *Small* 2017, **13**, 1700656.
- [S5] X. Liu, P. Xu, X. Li, Y. Peng, Z. Le, *J. Mater. Sci.* 2018, **53**, 15621-15630.
- [S6] L. Noerochim, J.Z. Wang, S.-L. Chou, D. Wexler, H.-K. Liu, *Carbon* 2012, **50**, 1289-1297.
- [S7] W. Zhang, R. Du, C. Zhou, S. Pu, B. Han, K. Xia, Q. Gao, J. Wu, *Mater. Today Energy* 2019, **12**, 303-310.
- [S8] H. Zhang, H. Song, X. Chen, J. Zhou, H. Zhang, *Electrochim. Acta* 2012, **59**, 160-167.
- [S9] D. Zhou, X. Li, L.-Z. Fan, Y. Deng, *Electrochim. Acta* 2017, **230**, 212-221.
- [S10] J. Wang, F. Fang, T. Yuan, J.H. Yang, L. Chen, C. Yao, S.Y. Zheng, D.L. Sun, *ACS Appl. Mater. Interfaces* 2017, **9**, 3544-3553.
- [S11] C. Ma, W. Zhang, Y.-S. He, Q. Gong, H. Che, Z.-F. Ma, *Nanoscale* 2016, **8**, 4121-4126.

- [S12] B. Luo, T. Qiu, B. Wang, L. Hao, X. Li, A. Cao, L. Zhi, *Nanoscale* 2015, **7**, 20380-20385.
- [S13] F. Zhang, C. Yang, X. Gao, S.Chen, Y. Hu, H. Guan, Y. Ma, J. Zhang, H. Zhou, L. Qi, *ACS Appl. Mater. Interfaces* 2017, **9**, 9620-9629.
- [S14] R. Tian, Y. Zhang, Z. Chen, H. Duan, B. Xu, Y. Guo, H. Kang, H. Li, H. Liu, *Sci. Rep.* 2016, **6**, 19195.
- [S15] J. Qin, N. Zhao, C. Shi, E. Liu, F. He, L. Ma, Q. Li, J. Li, C. He, *J. Mater. Chem. A* 2017, **5**, 10946-10956.
- [S16] J. Han, D. Kong, W. Lv, D.-M. Tang, D. Han, C. Zhang, D. Liu, Z. Xiao, X. Zhang, J. Xiao, X. He, F.-C. Hsia, C. Zhang, Y. Tao, D. Golberg, F. Kang, L. Zhi, Q.-H. Yang, *Nat. Commun.* 2018, **9**, 402.
- [S17] B. Cao, Z. Liu, C. Xu, J. Huang, H. Fang, Y. Chen, *J. Power Sources* 2019, **414**, 233-241.
- [S18] L. Sun, H. Si, Y. Zhang, Y. Shi, K. Wang, J. Liu, Y. Zhang, *J. Power Sources* 2019, **415**, 126-135.
